# Supplementary material for: Target Cell Extraction and Spectrum–Effect Relationship Coupled with BP Neural Network Classification for Screening Potential Bioactive Components in Ginseng Extract with a Protective Effect against Myocardial Damage
Source: MDPI journal article supplement (doi:10.3390/molecules29092028), 2024-04-28
Supplement: s1 [file s1]

Table S1. LC–MS/MS data in the negative ion mode for all compounds identified in RGE

| No | IDENTIFICATION                     | RT     | FORMULE                                         | M/Z       | M/Z CAL   | PPM   | IONS                                                                                                                                                                         |
|----|------------------------------------|--------|-------------------------------------------------|-----------|-----------|-------|------------------------------------------------------------------------------------------------------------------------------------------------------------------------------|
| 1  | Rg12/Re5/Ginsenjilinol/f-G-E/f-G-F | 24.847 | C <sub>42</sub> H <sub>72</sub> O <sub>15</sub> | 861.48.27 | 1252      | 1     | 861.4854[M-H+HCOOH] <sup>-</sup> ;815.4796[M-H] <sup>-</sup> ;653.4202[M-Glc-H] <sup>-</sup> ;491.3760[M-2Glc-H] <sup>-</sup>                                                |
| 2  | Rg12/Re5/Ginsenjilinol/f-G-E/f-G-F | 26.185 | C <sub>42</sub> H <sub>72</sub> O <sub>15</sub> | 861.4848  | 861.4853  | 0.61  | 861.4827[M-H+HCOOH] <sup>-</sup> ;815.4760[M-H] <sup>-</sup> ;653.4244[M-Glc-H] <sup>-</sup> ;491.3728[M-2Glc-H] <sup>-</sup>                                                |
| 3  | Noto ginsenoside R3                | 29.195 | C <sub>48</sub> H <sub>82</sub> O <sub>19</sub> | 1007.5424 | 1007.5358 | 2.77  | 1007.5375[M-H+HCOOH] <sup>-</sup> ;961.5355[M-H] <sup>-</sup> ;799.4811[M-Glc-H] <sup>-</sup> ;637.4298[M-2Glc-H] <sup>-</sup> ;475.3744[M-3Glc-H] <sup>-</sup>              |
| 4  | Re4/Q-F6                           | 31.804 | C <sub>47</sub> H <sub>80</sub> O <sub>18</sub> | 977.5325  | 977.5327  | 0.17  | 977.5325[M-H+HCOOH] <sup>-</sup> ;931.5250[M-H] <sup>-</sup> ;799.4843[M-Arap-H] <sup>-</sup> ;637.4276[M-Arap-Glc-H] <sup>-</sup> ; 475.3744[M- Arap -2Glc-H] <sup>-</sup>  |
| 5  | G-Ki/G-Km/G-ST2                    | 32.339 | C <sub>36</sub> H <sub>62</sub> O <sub>10</sub> | 699.4337  | 699.4325  | 1.71  | 699.4322[M-H+HCOOH] <sup>-</sup> ; 689.4058[M-H+Cl] <sup>-</sup> ; 653.4281[M-H] <sup>-</sup> ;491.3749[M-Glc-H] <sup>-</sup>                                                |
| 6  | Noto ginsenoside R1                | 33.208 | C <sub>47</sub> H <sub>80</sub> O <sub>18</sub> | 977.5739  | 977.5327  | 3.47  | 977.5332[M-H+HCOOH] <sup>-</sup> ;931.5259[M-H] <sup>-</sup> ;799.4872[M-Arap-H] <sup>-</sup> ;637.4310 [M- Arap -Glc-H] <sup>-</sup>                                        |
| 7  | Re1/Re2/Re3/NG-N/VG-R4             | 33.476 | C <sub>48</sub> H <sub>82</sub> O <sub>19</sub> | 1007.5456 | 1007.5432 | -2.35 | 1007.5420[M-H+HCOOH] <sup>-</sup> ;961.5366[M-H] <sup>-</sup> ;799.4791[M-Arap-H] <sup>-</sup> ;637.4272 [M- Arap -Glc-H] <sup>-</sup>                                       |
| 8  | Re4/Q-F6                           | 34.011 | C <sub>47</sub> H <sub>80</sub> O <sub>18</sub> | 977.5343  | 977.5327  | -1.67 | 977.5313[M-H+HCOOH] <sup>-</sup> ;931.5248[M-H] <sup>-</sup> ;799.4786[M-Arap-H] <sup>-</sup> ;637.4297[M- Arap -Glc-H] <sup>-</sup> ;475.3810[M- Arap -2Glc-H] <sup>-</sup> |

| No | IDENTIFICATION                     | RT     | FORMULE                                         | M/Z       | M/Z CAL   | PPM   | IONS                                                                                                                                                                                    |
|----|------------------------------------|--------|-------------------------------------------------|-----------|-----------|-------|-----------------------------------------------------------------------------------------------------------------------------------------------------------------------------------------|
| 9  | Re1/Re2/Re3/NG-N/VG-R4             | 34.546 | C <sub>48</sub> H <sub>82</sub> O <sub>19</sub> | 1007.5429 | 1007.5432 | 0.33  | 1007.5429[M-H+HCOOH] <sup>-</sup> ;961.5356[M-H] <sup>-</sup> ;<br>799.4787[M-Arap-H] <sup>-</sup> ;637.4008 [M- Arap -<br>Glc-H] <sup>-</sup> ; 475.3786[M- Arap -2Glc-H] <sup>-</sup> |
| 10 | Rg12/Re5/Ginsenjilinol/f-G-E/f-G-F | 34.747 | C <sub>42</sub> H <sub>72</sub> O <sub>15</sub> | 861.4856  | 861.4853  | -0.32 | 861.4856[M-H+HCOOH] <sup>-</sup> ;815.4786[M-H] <sup>-</sup> ;<br>653.4244[M-Glc-H] <sup>-</sup> ;491.3659 [M-2Glc-H] <sup>-</sup>                                                      |
| 11 | Re1/Re2/Re3/NG-N/VG-R4             | 35.683 | C <sub>48</sub> H <sub>82</sub> O <sub>19</sub> | 1007.5434 | 1007.5432 | -0.17 | 1007.5459[M-H+HCOOH] <sup>-</sup> ;961.5384[M-H] <sup>-</sup> ;<br>799.4892[M-Glc-H] <sup>-</sup> ;637.4263[M-2Glc-H] <sup>-</sup> ;<br>475.3660[M-3Glc-H] <sup>-</sup>                 |
| 12 | Ginsenoside Rg1                    | 36.887 | C <sub>42</sub> H <sub>72</sub> O <sub>14</sub> | 845.5235  | 845.5243  | 0.14  | 845.5235[M-H+HCOOH] <sup>-</sup> ;637.4520[M-H-Glc] <sup>-</sup> ;<br>475.3940[M-H-2Glc] <sup>-</sup>                                                                                   |
| 13 | Ginsenoside Re                     | 36.564 | C <sub>48</sub> H <sub>82</sub> O <sub>18</sub> | 991.5876  | 991.5893  | 1.99  | 991.5876[M-H+HCOOH] <sup>-</sup> ;945.5802[M-H] <sup>-</sup> ;<br>799.5148[M-H-Rha] <sup>-</sup> ; 637.4528[M-H--Rha<br>Glc] <sup>-</sup> ;475.3901[M-H-Rha-2Glc] <sup>-</sup>          |
| 14 | Malony(丙二酰)-Re                     | 41.971 | C <sub>51</sub> H <sub>84</sub> O <sub>21</sub> | 1031.5386 | 1031.5432 | 4.49  | 1031.5386[M-H] <sup>-</sup> ;885.4799[M-H-Rha] <sup>-</sup> ;<br>739.1880[M-H-2Rha] <sup>-</sup> ;739.1880[M-H-2Rha-Arap] <sup>-</sup>                                                  |
| 15 | Ac-Rd                              | 42.038 | C <sub>50</sub> H <sub>84</sub> O <sub>19</sub> | 987.5502  | 987.5475  | -2.7  | 987.5475[M-H] <sup>-</sup> ;841.4872[M-H-Rha] <sup>-</sup> ;<br>679.3690[M-Glc-Rha-H] <sup>-</sup> ;491.3659 [M-2Glc-H] <sup>-</sup>                                                    |
| 16 | NG-R2/G-F3/G-F5                    | 44.112 | C <sub>41</sub> H <sub>70</sub> O <sub>13</sub> | 815.4786  | 815.4798  | 1.89  | 815.4788[M-H+HCOOH] <sup>-</sup> ;769.4716[M-H] <sup>-</sup> ;<br>637.4225[M-H-Arap] <sup>-</sup> ;                                                                                     |
| 17 | NG-R2/G-F3/G-F5                    | 45.048 | C <sub>41</sub> H <sub>70</sub> O <sub>13</sub> | 815.4769  | 815.4798  | 3.61  | 815.4791[M-H+HCOOH] <sup>-</sup> ;769.4724[M-H] <sup>-</sup> ;<br>637.4288[M-H-Arap] <sup>-</sup> ; 475.3750[M-H-Arap-Glc] <sup>-</sup> ;                                               |

| No | IDENTIFICATION                     | RT     | FORMULE                                          | M/Z       | M/Z CAL   | PPM   | IONS                                                                                                                                                                                                                                                                                                                                            |
|----|------------------------------------|--------|--------------------------------------------------|-----------|-----------|-------|-------------------------------------------------------------------------------------------------------------------------------------------------------------------------------------------------------------------------------------------------------------------------------------------------------------------------------------------------|
| 18 | Notoginsenoside Rt                 | 45.115 | C <sub>44</sub> H <sub>74</sub> O <sub>15</sub>  | 887.4717  | 887.4567  | 0.62  | 887.4717[M-H+HCOOH] <sup>-</sup> ;841.4797[M-H] <sup>-</sup> ;<br>637.4119[M-H-C <sub>2</sub> H <sub>2</sub> O-Glc] <sup>-</sup> ;475.3662[M-H-C <sub>2</sub> H <sub>2</sub> O-2Glc] <sup>-</sup>                                                                                                                                               |
| 19 | Re1/Re2/Re3/NG-N/VG-R4             | 47.055 | C <sub>48</sub> H <sub>82</sub> O <sub>19</sub>  | 1007.5373 | 1007.5432 | 5.88  | 1007.5373[M-H+HCOOH] <sup>-</sup> ;961.5232[M-H] <sup>-</sup> ;799.4696[M-Glc-H] <sup>-</sup> ;637.4309[M-2Glc-H] <sup>-</sup> ;475.2728[M-3Glc-H] <sup>-</sup>                                                                                                                                                                                 |
| 20 | Rg12/Re5/Ginsenjilinol/f-G-E/f-G-F | 47.590 | C <sub>42</sub> H <sub>72</sub> O <sub>15</sub>  | 861.4860  | 861.4853  | -0.78 | 861.4864[M-H+HCOOH] <sup>-</sup> ;815.4808[M-H] <sup>-</sup> ;653.4232[M-Glc-H] <sup>-</sup> ;491.3730[M-2Glc-H] <sup>-</sup>                                                                                                                                                                                                                   |
| 21 | Ginsenoside Ra3/R4                 | 49.673 | C <sub>59</sub> H <sub>100</sub> O <sub>27</sub> | 1239.6907 | 1239.6902 | 0.5   | 1239.6907[M-H] <sup>-</sup> ;1077.6448[M-H-Xly] <sup>-</sup> ;945.5900[M-H-Xly-Glc] <sup>-</sup> ;783.5144[M-H-Xly-2Glc] <sup>-</sup> ;621.4648[M-H-Xly-3Glc] <sup>-</sup> ;459.3907[M-H-Xly-4Glc] <sup>-</sup>                                                                                                                                 |
| 22 | Re1/Re2/Re3/NG-N/VG-R4             | 50.868 | C <sub>48</sub> H <sub>82</sub> O <sub>19</sub>  | 1007.5428 | 1007.5432 | 0.73  | 1007.5412[M-H+HCOOH] <sup>-</sup> ;961.5358[M-H] <sup>-</sup> ;799.4867[M-Glc-H] <sup>-</sup> ;637.4200[M-2Glc-H] <sup>-</sup> ;475.3823[M-3Glc-H] <sup>-</sup>                                                                                                                                                                                 |
| 23 | Ginsenoside Rf                     | 52.406 | C <sub>42</sub> H <sub>72</sub> O <sub>14</sub>  | 845.5204  | 845.4904  | 2.36  | 845.5204[M-H+HCOOH] <sup>-</sup> ;799.5129[M-H] <sup>-</sup> ;637.4518[M-H-Glc] <sup>-</sup> ;475.3920[M-H-2Glc] <sup>-</sup> ;391.2939[M-H-2Glc-C <sub>6</sub> H <sub>12</sub> ] <sup>-</sup> ;<br>221.0694 1,3A2β; 101.0239 2,5A1β                                                                                                            |
| 24 | Ginsenoside Rf isomer              | 53.677 | C <sub>42</sub> H <sub>72</sub> O <sub>14</sub>  | 845.4917  | 845.4904  | -1.52 | 845.4957[M-H+HCOOH] <sup>-</sup> ;799.4869[M-H] <sup>-</sup> ;<br>637.4304[M-H-Glc] <sup>-</sup> ;475.3801[M-H-2Glc] <sup>-</sup> ;<br>1209.6282[M-H] <sup>-</sup> ;915.5354[M-Glc-Xylp-H] <sup>-</sup> ;783.5187[M-Glc-Xylp-Araf-H] <sup>-</sup> ;<br>621.4573[M-2Glc-Xylp-Araf-H] <sup>-</sup> ;<br>459.3967[M-3Glc-Xylp-Araf-H] <sup>-</sup> |
| 25 | Ginsenoside Ra2/Ra1                | 54.814 | C <sub>58</sub> H <sub>98</sub> O <sub>26</sub>  | 1209.6777 | 1209.6732 | 2.02  |                                                                                                                                                                                                                                                                                                                                                 |

| No | IDENTIFICATION     | RT     | FORMULE                                          | M/Z       | M/Z CAL   | PPM   | IONS                                                                                                                                                                                                                                                             |
|----|--------------------|--------|--------------------------------------------------|-----------|-----------|-------|------------------------------------------------------------------------------------------------------------------------------------------------------------------------------------------------------------------------------------------------------------------|
| 26 | NG-R2/G-F3/G-F5    | 55.483 | C <sub>41</sub> H <sub>70</sub> O <sub>13</sub>  | 815.4798  | 815.4798  | 0.06  | 815.4798[M-H+HCOOH] <sup>-</sup> ;769.4727[M-H] <sup>-</sup> ;<br>637.4295[M-H-Arap] <sup>-</sup> ; 475.3791[M-H-Arap-<br>Glc] <sup>-</sup> ;                                                                                                                    |
| 27 | Ginsenoside R4/Ra3 | 55.818 | C <sub>59</sub> H <sub>100</sub> O <sub>27</sub> | 1239.6385 | 1239.6379 | 0.47  | 1239.6358[M-H] <sup>-</sup> ;1077.5830[M-H-<br>Xly] <sup>-</sup> ;945.5326[M-H-Xly-Glc] <sup>-</sup> ;783.4673[M-<br>H-Xly-2Glc] <sup>-</sup> ;621.4356[M-H-Xly-<br>3Glc] <sup>-</sup> ;459.3962[M-H-Xly-4Glc] <sup>-</sup>                                      |
| 28 | Ginsenoside Rb1    | 56.152 | C <sub>54</sub> H <sub>92</sub> O <sub>23</sub>  | 1107.6414 | 1107.6426 | -3.19 | 1153.6413[M-H+HCOOH] <sup>-</sup> ;1107.6424[M-H] <sup>-</sup> ;<br>945.5788[M-H-Glc] <sup>-</sup> ; 783.5190[M-H-2Glc] <sup>-</sup> ;<br>621.4607[M-H-3Glc] <sup>-</sup> ;459.4013[M-H-4Glc] <sup>-</sup>                                                       |
| 29 | m- Rb1             | 57.825 | C <sub>57</sub> H <sub>94</sub> O <sub>26</sub>  | 1193.5951 | 1193.5961 | 0.8   | 1193.5951[M-H] <sup>-</sup> ; 1149.6028[M-H-CO <sub>2</sub> ] <sup>-</sup><br>1107.5883[M-H-Ma] <sup>-</sup> ; 945.5371[M-H-Glc-<br>Ma] <sup>-</sup> ; 783.4886[M-H-2Glc-Ma] <sup>-</sup> ; 621.4607[M-<br>H-3Glc] <sup>-</sup> ;459.4013[M-H-4Glc] <sup>-</sup> |
| 30 | Ginsenoside Rg2    | 59.096 | C <sub>42</sub> H <sub>72</sub> O <sub>13</sub>  | 829.4994  | 829.4955  | -4.7  | 829.4994[M-H+HCOOH] <sup>-</sup> ;783.4933[M-<br>H] <sup>-</sup> ;475.8112[M-H-Rha-Glc] <sup>-</sup> ; 391.9717[M-H-<br>Rha-Glc-C6H12] <sup>-</sup>                                                                                                              |
| 31 | Ginsenoside Rb3    | 59.497 | C <sub>53</sub> H <sub>90</sub> O <sub>22</sub>  | 1123.5971 | 1123.5906 | -5.8  | 1077.5891[M-H] <sup>-</sup> ;945.6899[M-Arap-<br>H] <sup>-</sup> ;783.4933[M-Arap-Glc-H] <sup>-</sup> ; 621.4260[M-<br>Arap-2Glc-H] <sup>-</sup> ;459.3817 [M-Arap-3Glc-H] <sup>-</sup>                                                                          |
| 32 | Ginsenoside Rc     | 63.644 | C <sub>53</sub> H <sub>90</sub> O <sub>22</sub>  | 1077.6291 | 1077.6282 | 5.1   | 1077.6291[M-H] <sup>-</sup> ;945.5783[M-Araf-<br>H] <sup>-</sup> ;783.5164[M-H-Araf-Glc] <sup>-</sup> ;621.4609[M-H-<br>Araf-2Glc] <sup>-</sup> ;459.3980[M-H-Araf-3Glc] <sup>-</sup>                                                                            |
| 33 | Rh1                | 60.032 | C <sub>36</sub> H <sub>62</sub> O <sub>9</sub>   | 683.4383  | 683.4376  | -1.04 | 683.4377 [M-H+HCOOH] <sup>-</sup> ;637.4321 [M-H] <sup>-</sup> ;<br>475.3721[M-H-Glc] <sup>-</sup>                                                                                                                                                               |
| 34 | Ginsenoside F2     | 60.567 | C <sub>42</sub> H <sub>72</sub> O <sub>13</sub>  | 829.4959  | 829.4955  | -0.49 | 829.4959 [M-H+HCOOH] <sup>-</sup> ;783.4890 [M-H] <sup>-</sup> ;<br>637.4297[M-H-Rha] <sup>-</sup>                                                                                                                                                               |

| No | IDENTIFICATION  | RT     | FORMULE                                         | M/Z       | M/Z CAL   | PPM   | IONS                                                                                                                                                                                                                                                                                                                                        |
|----|-----------------|--------|-------------------------------------------------|-----------|-----------|-------|---------------------------------------------------------------------------------------------------------------------------------------------------------------------------------------------------------------------------------------------------------------------------------------------------------------------------------------------|
| 35 | Ginsenoside Ro  | 61.169 | C <sub>48</sub> H <sub>76</sub> O <sub>19</sub> | 955.5309  | 955.5295  | 5.86  | 955.5309[M-H] <sup>-</sup> ;793.4684 [M-H-Glc] <sup>-</sup> ;775.4506[M-H-H <sub>2</sub> O-Glc] <sup>-</sup> ;731.4631[M-H-CO <sub>2</sub> -H <sub>2</sub> O-Glc] <sup>-</sup> ; 613.3954[M-H-H <sub>2</sub> O-2Glc] <sup>-</sup> ;569.4022[M-H-CO <sub>2</sub> -H <sub>2</sub> O-2Glc] <sup>-</sup> ;455.3675[M-H-2Glc -GlcA] <sup>-</sup> |
| 36 | m-Rc            | 61.571 | C <sub>56</sub> H <sub>92</sub> O <sub>25</sub> | 1163.5850 | 1163.5855 | 0.42  | 1163.5850[M-H] <sup>-</sup> ; 1077.6291[M-H-Ma] <sup>-</sup> 1001.2398[M-Araf-H] <sup>-</sup> ;783.4866[M-H-Araf-Glc-Ma] <sup>-</sup> ;621.4341[M-H-Araf-2Glc-Ma] <sup>-</sup> ;                                                                                                                                                            |
| 37 | Ginsenoside F1  | 62.775 | C <sub>36</sub> H <sub>62</sub> O <sub>9</sub>  | 683.4351  | 683.4376  | 3.63  | 683.4351 [M-H+HCOOH] <sup>-</sup> ;637.2598 [M-H] <sup>-</sup> ; 475.3772[M-H-Glc] <sup>-</sup>                                                                                                                                                                                                                                             |
| 38 | Ginsenoside Rb2 | 64.915 | C <sub>53</sub> H <sub>90</sub> O <sub>22</sub> | 1123.5948 | 1123.5906 | -3.75 | 1077.5916[M-H] <sup>-</sup> ;945.5488[M-Arap-H] <sup>-</sup> ;783.4918[M-Arap-Glc-H] <sup>-</sup> ;621.4609[M-Arap-2Glc-H] <sup>-</sup> ; 459.4037[M-Arap-3Glc-H] <sup>-</sup>                                                                                                                                                              |
| 39 | Ac-Rc           | 65.852 | C <sub>55</sub> H <sub>92</sub> O <sub>23</sub> | 1119.5976 | 1119.5957 | -1.73 | 1119.5927[M-H] <sup>-</sup> ;987.5522[M-Arap-H] <sup>-</sup> ;825.4959[M-Arap-Glc-H] <sup>-</sup> ;663.4123 [M-Arap-2Glc-H] <sup>-</sup>                                                                                                                                                                                                    |
| 40 | m-Rb2           | 65.919 | C <sub>56</sub> H <sub>92</sub> O <sub>25</sub> | 1163.5835 | 1163.5855 | 1.71  | 1163.5835[M-H] <sup>-</sup> ; 1077.5824[M-H-Ma] <sup>-</sup> ;783.4824[M-H-Araf-Glc-Ma] <sup>-</sup> ;621.4389[M-H-Araf-2Glc-Ma] <sup>-</sup> ;                                                                                                                                                                                             |
| 41 | m-Rb3           | 67.123 | C <sub>56</sub> H <sub>92</sub> O <sub>25</sub> | 1163.5864 | 1163.5855 | -0.78 | 1163.5851[M-H] <sup>-</sup> ; 1077.5838[M-H-Ma] <sup>-</sup> ;783.4909[M-H-Araf-Glc-Ma] <sup>-</sup> ;621.4355[M-H-Araf-2Glc-Ma] <sup>-</sup> ;                                                                                                                                                                                             |
| 42 | Ac(乙酰基)-Rb1     | 68.527 | C <sub>56</sub> H <sub>94</sub> O <sub>24</sub> | 1149.6038 | 1149.3062 | 2.11  | 1149.6067[M-H] <sup>-</sup> ;987.5680[M-Glc-H] <sup>-</sup> ;825.4937[M-2Glc-H] <sup>-</sup> ; 663.4506[M-3Glc-H] <sup>-</sup> ;                                                                                                                                                                                                            |

| No | IDENTIFICATION        | RT     | FORMULE                                          | M/Z       | M/Z CAL   | PPM   | IONS                                                                                                                                                                                                                                             |
|----|-----------------------|--------|--------------------------------------------------|-----------|-----------|-------|--------------------------------------------------------------------------------------------------------------------------------------------------------------------------------------------------------------------------------------------------|
| 43 | Rh19                  | 69.932 | C <sub>36</sub> H <sub>62</sub> O <sub>9</sub>   | 683.4369  | 683.4376  | 1     | 683.4367[M-H] <sup>-</sup> ;537.3386[M-Arap-H] <sup>-</sup> ;391.3530[M-Arap-Rha-H] <sup>-</sup>                                                                                                                                                 |
| 44 | m-Rc-isomer           | 71.538 | C <sub>56</sub> H <sub>92</sub> O <sub>25</sub>  | 1163.5808 | 1163.5855 | 4.03  | 1163.5808[M-H] <sup>-</sup> ; 1077.5808[M-H-Ma] <sup>-</sup> ;783.4979[M-H-Araf-Glc-Ma] <sup>-</sup> ;621.4227[M-H-Araf-2Glc-Ma] <sup>-</sup> ; 1251.6446[M-H] <sup>-</sup> ;1119.5950[M-H-Arap] <sup>-</sup> ;                                  |
| 45 | Ra5/isomer            | 72.073 | C <sub>60</sub> H <sub>100</sub> O <sub>27</sub> | 1251.6446 | 1251.6379 | -5.33 | 957.9219[M-H-2Arap] <sup>-</sup> ;825.4944[M-H-3Arap] <sup>-</sup> ; 991.5879[M-H+HCOOH] <sup>-</sup> ;945.5791[M-H] <sup>-</sup> ;783.5167[M-H-Glc] <sup>-</sup> ; 621.4575[M-H-2Glc] <sup>-</sup> ; 459.3973[M-H-3Glc] <sup>-</sup> ; 101.0238 |
| 46 | Ginsenoside Rd        | 72.541 | C <sub>48</sub> H <sub>82</sub> O <sub>18</sub>  | 991.5879  | 991.5483  | -0.59 | 2,5A1 $\alpha$ /2,5A1 $\beta$<br>1031.5374[M-H] <sup>-</sup> ;945.5426[M-H-Ma] <sup>-</sup> ;783.4961[M-H-Glc-Ma] <sup>-</sup> ;765.4784[M-H-H2O-Glc-Ma] <sup>-</sup> ; 621.4375[M-H-2Glc-Ma] <sup>-</sup> ;459.3864[M-H-3Glc-Ma] <sup>-</sup>   |
| 47 | Maonyl-Ginsenoside Rd | 74.08  | C <sub>51</sub> H <sub>84</sub> O <sub>21</sub>  | 1031.5451 | 1031.5432 | 1.81  | 1031.5362[M-H] <sup>-</sup> ;945.5352[M-H-Ma] <sup>-</sup> ;783.4920[M-H-Glc-Ma] <sup>-</sup> ;765.4708[M-H-H2O-Glc-Ma] <sup>-</sup> ; 621.4300[M-H-2Glc-Ma] <sup>-</sup> ;459.3924[M-H-3Glc-Ma] <sup>-</sup>                                    |
| 48 | Malony(丙二酰)-Re        | 74.949 | C <sub>51</sub> H <sub>84</sub> O <sub>21</sub>  | 1031.5404 | 1031.5432 | 2.74  | 1165.5949[M-H+HCOOH] <sup>-</sup> ;1119.5988[M-H] <sup>-</sup> ;1077.5854[M-C2H2O-H] <sup>-</sup>                                                                                                                                                |
| 49 | Ginsenoside Rs2/ Rs1  | 75.15  | C <sub>55</sub> H <sub>92</sub> O <sub>23</sub>  | 1165.6514 | 1165.6011 | 1.84  | 945.5429[M-C2H2O-Araf-H] <sup>-</sup> ;915.5755[M-C2H2O-Glc-H] <sup>-</sup> ; 783.5176[M-C2H2O-Glc-Araf-H] <sup>-</sup> ;621.4214[M-C2H2O-2Glc-Araf-H] <sup>-</sup> ; 459.3903[M-C2H2O-3Glc-Araf-H] <sup>-</sup>                                 |

| No | IDENTIFICATION       | RT     | FORMULE                                         | M/Z       | M/Z CAL   | PPM   | IONS                                                                                                                                                                                                                                                                                                                       |
|----|----------------------|--------|-------------------------------------------------|-----------|-----------|-------|----------------------------------------------------------------------------------------------------------------------------------------------------------------------------------------------------------------------------------------------------------------------------------------------------------------------------|
| 50 | Ginsenoside Rs2/ Rs1 | 75.752 | C <sub>55</sub> H <sub>92</sub> O <sub>23</sub> | 1165.6022 | 1165.6011 | 4.32  | 1165.6514[M-H+HCOOH] <sup>-</sup> ;1119.6416[M-H] <sup>-</sup> ;<br>1077.6260[M-C2H2O-H] <sup>-</sup> ;945.5444[M-C2H2O-Arap-H] <sup>-</sup> ; 915.5436[M-C2H2O-Glc-H] <sup>-</sup> ;<br>783.4980[M-C2H2O-Glc-Arap-H] <sup>-</sup> ;621.4163[M-C2H2O-2Glc-Arap-H] <sup>-</sup> ;459.3801[M-C2H2O-3Glc-Arap-H] <sup>-</sup> |
| 51 | Ac-Rb2               | 76.889 | C <sub>55</sub> H <sub>92</sub> O <sub>23</sub> | 1165.5963 | 1165.6011 | -0.22 | 1165.6014[M-H+HCOOH] <sup>-</sup> ;1119.5965[M-H] <sup>-</sup> ;<br>1077.5869[M-C2H2O-H] <sup>-</sup> ;945.5513[M-C2H2O-Arap-H] <sup>-</sup> ; 915.5233[M-C2H2O-Glc-H] <sup>-</sup> ;<br>1165.5997[M-H+HCOOH] <sup>-</sup> ;1119.5933[M-H] <sup>-</sup> ;                                                                  |
| 52 | Ac-Rb3               | 78.695 | C <sub>55</sub> H <sub>92</sub> O <sub>23</sub> | 1165.5964 | 1165.6011 | 4.06  | 1077.5825[M-C2H2O-H] <sup>-</sup> ;945.5332[M-C2H2O-Arap-H] <sup>-</sup> ; 915.5251[M-C2H2O-Glc-H] <sup>-</sup> ;                                                                                                                                                                                                          |
| 53 | Ac-Rd isomer         | 79.565 | C <sub>50</sub> H <sub>84</sub> O <sub>19</sub> | 987.5466  | 987.5534  | 6.88  | 1033.5532[M-H+HCOOH] <sup>-</sup> ;987.5466[M-H] <sup>-</sup> ;<br>825.4892[M-H-Glc] <sup>-</sup> ;663.4407[M-H-2Glc] <sup>-</sup>                                                                                                                                                                                         |
| 54 | NG-Fe                | 79.693 | C <sub>47</sub> H <sub>80</sub> O <sub>17</sub> | 961.5361  | 961.5378  | 1.72  | 961.5324[M-H+HCOOH] <sup>-</sup> ;915.5144[M-H] <sup>-</sup> ;<br>783.4822[M-H-Arap] <sup>-</sup> ;                                                                                                                                                                                                                        |
| 55 | Ginsenoside Rg9/Rg10 | 79.966 | C <sub>42</sub> H <sub>70</sub> O <sub>13</sub> | 827.4785  | 827.4798  | 0.3   | 827.4767[M-H+HCOOH] <sup>-</sup> ;781.4759[M-H] <sup>-</sup> ;<br>619.4167[M-H-Glc] <sup>-</sup> ;457.3706[M-H-2Glc] <sup>-</sup>                                                                                                                                                                                          |
| 56 | VG-R16               | 80.100 | C <sub>47</sub> H <sub>80</sub> O <sub>17</sub> | 961.5324  | 961.5378  | 5.56  | 961.5360[M-H+HCOOH] <sup>-</sup> ;915.5322[M-H] <sup>-</sup> ;<br>783.4720[M-H-Arap] <sup>-</sup> ;                                                                                                                                                                                                                        |
| 57 | Ginsenoside Rg9/Rg10 | 81.304 | C <sub>42</sub> H <sub>70</sub> O <sub>13</sub> | 827.4785  | 827.4798  | 0.3   | 827.4767[M-H+HCOOH] <sup>-</sup> ;781.4718[M-H] <sup>-</sup> ;<br>619.4133[M-H-Glc] <sup>-</sup> ;457.3612[M-H-2Glc] <sup>-</sup>                                                                                                                                                                                          |
| 58 | Ac-Re isomer         | 82.040 | C <sub>50</sub> H <sub>84</sub> O <sub>19</sub> | 987.5467  | 987.5534  | 6.78  | 1033.5537[M-H+HCOOH] <sup>-</sup> ;987.5467[M-H] <sup>-</sup> ;<br>825.4893[M-H-Glc] <sup>-</sup> ;663.4323[M-H-2Glc] <sup>-</sup>                                                                                                                                                                                         |

| No | IDENTIFICATION        | RT     | FORMULE                                         | M/Z      | M/Z CAL  | PPM   | IONS                                                                                                                                                                                                                                                                                                                                                 |
|----|-----------------------|--------|-------------------------------------------------|----------|----------|-------|------------------------------------------------------------------------------------------------------------------------------------------------------------------------------------------------------------------------------------------------------------------------------------------------------------------------------------------------------|
| 59 | Notoginsenoside T5    | 82.976 | C <sub>41</sub> H <sub>68</sub> O <sub>12</sub> | 797.4671 | 797.4693 | 2.73  | 797.4642[M-H+HCOOH] <sup>-</sup> ;751.4656[M-H] <sup>-</sup> ;<br>619.4252[M-H-Xylp] <sup>-</sup> ;457.3645[M-H-Xylp-<br>Glc] <sup>-</sup>                                                                                                                                                                                                           |
| 60 | Ginsenoside Rg6/Rg4   | 84.047 | C <sub>42</sub> H <sub>70</sub> O <sub>12</sub> | 811.4838 | 811.4849 | 1.39  | 811.4791[M-H+HCOOH] <sup>-</sup> ;765.4675[M-H] <sup>-</sup> ;<br>619.4211[M-H-Rha] <sup>-</sup> ;457.3609[M-H-Glc-<br>Rha] <sup>-</sup>                                                                                                                                                                                                             |
| 61 | Ginsenoside Rg6/Rg4   | 85.251 | C <sub>42</sub> H <sub>70</sub> O <sub>12</sub> | 811.4848 | 811.4849 | 1.39  | 811.4791[M-H+HCOOH] <sup>-</sup> ;765.4859[M-H] <sup>-</sup> ;<br>619.4211[M-H-Rha] <sup>-</sup> ;457.3609[M-H-Glc-<br>Rha] <sup>-</sup>                                                                                                                                                                                                             |
| 62 | Chikusetsusaponin IVa | 87.324 | C <sub>42</sub> H <sub>66</sub> O <sub>14</sub> | 793.4369 | 793.4380 | 1.36  | 793.4329[M-H] <sup>-</sup> ;613.3735[M-Glc-<br>H] <sup>-</sup> ;587.3984[M-Glc-CO <sub>2</sub> -H] <sup>-</sup> ;455.3528[M-<br>Glc-GlcA-H] <sup>-</sup>                                                                                                                                                                                             |
| 63 | Ginsenoside Rh4/Rk3   | 86.388 | C <sub>36</sub> H <sub>60</sub> O <sub>8</sub>  | 665.4273 | 665.4270 | 1.23  | 665.4235[M-H+HCOOH] <sup>-</sup> ;619.3950[M-H] <sup>-</sup> ;<br>457.3587[M-H-Glc] <sup>-</sup>                                                                                                                                                                                                                                                     |
| 64 | Ginsenoside Rh4/Rk4   | 87.859 | C <sub>36</sub> H <sub>60</sub> O <sub>8</sub>  | 665.4272 | 665.4270 | -0.27 | 665.4235[M-H+HCOOH] <sup>-</sup> ;619.3950[M-H] <sup>-</sup> ;<br>457.3588[M-H-Glc] <sup>-</sup>                                                                                                                                                                                                                                                     |
| 65 | 20(S)-ginsenoside Rg3 | 89.665 | C <sub>42</sub> H <sub>72</sub> O <sub>13</sub> | 829.4973 | 829.4955 | -2.17 | 829.4920[M-H+HCOOH] <sup>-</sup> ;783.4895[M-H] <sup>-</sup> ;<br>621.4357[M-H-Glc] <sup>-</sup> ;<br>549.3828[M-H-2Glc] <sup>-</sup>                                                                                                                                                                                                                |
| 66 | 20(R)-ginsenoside Rg3 | 90.468 | C <sub>42</sub> H <sub>72</sub> O <sub>13</sub> | 829.4999 | 829.4955 | -5.3  | 829.4920[M-H+HCOOH] <sup>-</sup> ;783.4897[M-<br>H] <sup>-</sup> ;621.4385[M-H-Glc] <sup>-</sup> ;459.3853[M-H-<br>2Glc] <sup>-</sup>                                                                                                                                                                                                                |
| 67 | 20(S)-ginsenoside Rs3 | 96.02  | C <sub>44</sub> H <sub>74</sub> O <sub>14</sub> | 871.5073 | 871.5061 | 1.42  | 871.5010[M-H+HCOOH] <sup>-</sup> ;825.5464[M-H] <sup>-</sup> ;<br>783.4838[M-H-C <sub>2</sub> H <sub>2</sub> O] <sup>-</sup> ; 765.4728[M-H-<br>C <sub>2</sub> H <sub>2</sub> O-H <sub>2</sub> O] <sup>-</sup> ; 621.4334[M-H-C <sub>2</sub> H <sub>2</sub> O-<br>Glc] <sup>-</sup> ;459.3855[M-H-C <sub>2</sub> H <sub>2</sub> O-2Glc] <sup>-</sup> |



| No | IDENTIFICATION        | RT      | FORMULE                                         | M/Z      | M/Z CAL  | PPM   | IONS                                                                                                                                                                                                                                                                                                                                                 |
|----|-----------------------|---------|-------------------------------------------------|----------|----------|-------|------------------------------------------------------------------------------------------------------------------------------------------------------------------------------------------------------------------------------------------------------------------------------------------------------------------------------------------------------|
| 68 | 20(R)-ginsenoside Rs3 | 96.957  | C <sub>44</sub> H <sub>74</sub> O <sub>14</sub> | 871.5067 | 871.5061 | -0.73 | 871.5010[M-H+HCOOH] <sup>-</sup> ;825.5464[M-H] <sup>-</sup> ;<br>783.4838[M-H-C <sub>2</sub> H <sub>2</sub> O] <sup>-</sup> ; 765.4728[M-H-<br>C <sub>2</sub> H <sub>2</sub> O-H <sub>2</sub> O] <sup>-</sup> ; 621.4334[M-H-C <sub>2</sub> H <sub>2</sub> O-<br>Glc] <sup>-</sup> ;459.3855[M-H-C <sub>2</sub> H <sub>2</sub> O-3Glc] <sup>-</sup> |
| 69 | Ginsenoside Rk1/Rg5   | 100.569 | C <sub>42</sub> H <sub>70</sub> O <sub>12</sub> | 811.4871 | 811.4849 | -2.67 | 811.4791[M-H+HCOOH] <sup>-</sup> ;765.4854[M-<br>H] <sup>-</sup> ;603.4249[M-H-Glc] <sup>-</sup> ;441.3687[M-H-<br>2Glc] <sup>-</sup>                                                                                                                                                                                                                |
| 70 | Ginsenoside Rk1/Rg6   | 101.639 | C <sub>42</sub> H <sub>70</sub> O <sub>13</sub> | 811.4824 | 811.4849 | 3.11  | 811.4791[M-H+HCOOH] <sup>-</sup> ;765.4854[M-<br>H] <sup>-</sup> ;603.4249[M-H-Glc] <sup>-</sup> ;441.3687[M-H-<br>3Glc] <sup>-</sup>                                                                                                                                                                                                                |

Table S2. LC–MS/MS data in the negative ion mode for common peaks identified in 12 batches RGE

| No | IDENTIFICATION         | RT     | FORMULE                                          | M/Z       | M/Z CAL   | PPM  | IONS                                                                                                                                                                                                                 |
|----|------------------------|--------|--------------------------------------------------|-----------|-----------|------|----------------------------------------------------------------------------------------------------------------------------------------------------------------------------------------------------------------------|
| 1  | Notoginsenoside R3     | 28.337 | C <sub>48</sub> H <sub>82</sub> O <sub>19</sub>  | 1007.5424 | 1007.5358 | 2.77 | 1007.5375[M-H+HCOOH] <sup>-</sup> ; 961.5355[M-H] <sup>-</sup> ; 799.4811[M-Glc-H] <sup>-</sup> ; 637.4298[M-2Glc-H] <sup>-</sup> ; 475.3744[M-3Glc-H] <sup>-</sup>                                                  |
| 2  | Re1/Re2/Re3/NG-N/VG-R4 | 32.472 | C <sub>48</sub> H <sub>82</sub> O <sub>19</sub>  | 1007.5421 | 1007.5407 | 1.73 | 1007.5421[M-H+HCOOH] <sup>-</sup> ; 961.5372[M-H] <sup>-</sup> ; 799.4805[M-Glc-H] <sup>-</sup> ; 637.4237[M-2Glc-H] <sup>-</sup> ; 475.3747[M-3Glc-H] <sup>-</sup>                                                  |
| 3  | Notoginsenoside R1     | 33.208 | C <sub>47</sub> H <sub>80</sub> O <sub>18</sub>  | 977.5739  | 977.5327  | 3.47 | 977.5332[M-H+HCOOH] <sup>-</sup> ; 931.5259[M-H] <sup>-</sup> ; 799.4872[M-Arap-H] <sup>-</sup> ; 637.4310 [M-Arap - Glc-H] <sup>-</sup>                                                                             |
| 4  | Ginsenoside Rg1        | 36.887 | C <sub>42</sub> H <sub>72</sub> O <sub>14</sub>  | 845.5235  | 845.5243  | 0.14 | 845.5235[M-H+HCOOH] <sup>-</sup> ; 637.4520[M-H-Glc] <sup>-</sup> ; 475.3940[M-H-2Glc] <sup>-</sup>                                                                                                                  |
| 5  | Ginsenoside Re         | 36.564 | C <sub>48</sub> H <sub>82</sub> O <sub>18</sub>  | 991.5876  | 991.5893  | 1.99 | 991.5876[M-H+HCOOH] <sup>-</sup> ; 945.5802[M-H] <sup>-</sup> ; 799.5148[M-H-Rha] <sup>-</sup> ; 637.4528[M-H--Rha Glc] <sup>-</sup> ; 475.3901[M-H-Rha-2Glc] <sup>-</sup>                                           |
| 6  | Notoginsenoside Rt     | 45.115 | C <sub>44</sub> H <sub>74</sub> O <sub>15</sub>  | 887.4717  | 887.4567  | 0.62 | 887.4717[M-H+HCOOH] <sup>-</sup> ; 841.4797[M-H] <sup>-</sup> ; 637.4119[M-H-C <sub>2</sub> H <sub>2</sub> O-Glc] <sup>-</sup> ; 475.3662[M-H-C <sub>2</sub> H <sub>2</sub> O-2Glc] <sup>-</sup>                     |
| 7  | Ginsenoside Ra3/R4     | 49.673 | C <sub>59</sub> H <sub>100</sub> O <sub>27</sub> | 1239.6907 | 1239.6902 | 0.5  | 1239.6907[M-H] <sup>-</sup> ; 1077.6448[M-H-Xly] <sup>-</sup> ; 945.5900[M-H-Xly-Glc] <sup>-</sup> ; 783.5144[M-H-Xly-2Glc] <sup>-</sup> ; 621.4648[M-H-Xly-3Glc] <sup>-</sup> ; 459.3907[M-H-Xly-4Glc] <sup>-</sup> |

| No | IDENTIFICATION      | RT     | FORMULE                                          | M/Z       | M/Z CAL   | PPM  | IONS                                                                                                                                                                                                                                                                                                                                               |
|----|---------------------|--------|--------------------------------------------------|-----------|-----------|------|----------------------------------------------------------------------------------------------------------------------------------------------------------------------------------------------------------------------------------------------------------------------------------------------------------------------------------------------------|
| 8  | Ginsenoside Rf      | 50.400 | C <sub>42</sub> H <sub>72</sub> O <sub>14</sub>  | 845.5204  | 845.4904  | 2.36 | 845.5204[M-H+HCOOH] <sup>-</sup> ;799.5129[M-H] <sup>-</sup> ;637.4518[M-H-Glc] <sup>-</sup> ;475.3920[M-H-2Glc] <sup>-</sup> ;391.2939[M-H-2Glc-C <sub>6</sub> H <sub>12</sub> ] <sup>-</sup> ;221.0694 1,3A2β; 101.0239 2,5A1β                                                                                                                   |
| 12 | Ginsenoside R4/Ra3  | 55.818 | C <sub>59</sub> H <sub>100</sub> O <sub>27</sub> | 1239.6385 | 1239.6379 | 0.47 | 1239.6358[M-H] <sup>-</sup> ;1077.5830[M-H-Xly] <sup>-</sup> ;945.5326[M-H-Xly-Glc] <sup>-</sup> ;783.4673[M-H-Xly-2Glc] <sup>-</sup> ;621.4356[M-H-Xly-3Glc] <sup>-</sup> ;459.3962[M-H-Xly-4Glc] <sup>-</sup>                                                                                                                                    |
| 9  | Ginsenoside Ra2/Ra1 | 54.814 | C <sub>58</sub> H <sub>98</sub> O <sub>26</sub>  | 1209.6777 | 1209.6732 | 2.02 | 915.5354[M-Glc-Xylp-H] <sup>-</sup> ;783.5187[M-Glc-Xylp-Araf-H] <sup>-</sup> ;621.4573[M-2Glc-Xylp-Araf-H] <sup>-</sup> ;459.3967[M-3Glc-Xylp-Araf-H] <sup>-</sup> ;459.3967[M-3Glc-Xylp-Araf-H] <sup>-</sup> ;815.5116[M-H+HCOOH] <sup>-</sup> ;769.5042[M-H] <sup>-</sup> ;637.4514[M-H-Xylp] <sup>-</sup> ;475.3929[M-H-Glc-Xylp] <sup>-</sup> |
| 11 | Notoginsenoside R2  | 55.483 | C <sub>41</sub> H <sub>70</sub> O <sub>13</sub>  | 815.5116  | 815.5110  | 0.68 | 1153.6413[M-H+HCOOH] <sup>-</sup> ;1107.6424[M-H] <sup>-</sup> ;945.5788[M-H-Glc] <sup>-</sup> ;783.5190[M-H-2Glc] <sup>-</sup> ;621.4607[M-H-3Glc] <sup>-</sup> ;459.4013[M-H-4Glc] <sup>-</sup>                                                                                                                                                  |
| 10 | Ginsenoside Rb1     | 55.023 | C <sub>54</sub> H <sub>92</sub> O <sub>23</sub>  | 1107.6414 | 1107.6426 | 0.75 | 829.5290[M-H+HCOOH] <sup>-</sup> ;783.5190[M-H] <sup>-</sup> ;637.4541[M-H-Rha] <sup>-</sup> ;475.3945[M-H-Rha-Glc] <sup>-</sup> ;391.2955[M-H-Rha-Glc-C <sub>6</sub> H <sub>12</sub> ] <sup>-</sup>                                                                                                                                               |
| 13 | Ginsenoside Rg2     | 59.096 | C <sub>42</sub> H <sub>72</sub> O <sub>13</sub>  | 829.529   | 829.5278  | 3.65 |                                                                                                                                                                                                                                                                                                                                                    |

| No | IDENTIFICATION          | RT     | FORMULE                                         | M/Z       | M/Z CAL   | PPM   | IONS                                                                                                                                                                                                                                                                                                                        |
|----|-------------------------|--------|-------------------------------------------------|-----------|-----------|-------|-----------------------------------------------------------------------------------------------------------------------------------------------------------------------------------------------------------------------------------------------------------------------------------------------------------------------------|
| 14 | Ginsenoside Rc          | 59.564 | C <sub>53</sub> H <sub>90</sub> O <sub>22</sub> | 1077.6291 | 1077.6282 | 4.58  | 1077.6291[M-H] <sup>-</sup> ;945.5783[M-Araf-H] <sup>-</sup> ;783.5164[M-H-Araf-Glc] <sup>-</sup> ;621.4609[M-H-Araf-2Glc] <sup>-</sup> ;459.3980[M-H-Araf-3Glc] <sup>-</sup> 955.5309[M-H] <sup>-</sup> ;793.4684 [M-H-Glc] <sup>-</sup> ;775.4506[M-H-H <sub>2</sub> O-Glc] <sup>-</sup> ;                                |
| 15 | Ginsenoside Ro          | 61.169 | C <sub>48</sub> H <sub>76</sub> O <sub>19</sub> | 955.5309  | 955.5295  | -2.72 | 731.4631[M-H-CO <sub>2</sub> -H <sub>2</sub> O-Glc] <sup>-</sup> ;613.3954[M-H-H <sub>2</sub> O-2Glc] <sup>-</sup> ;569.4022[M-H-CO <sub>2</sub> -H <sub>2</sub> O-2Glc] <sup>-</sup> ;455.3675[M-H-2Glc -GlcA] <sup>-</sup> 1193.5861[M-H] <sup>-</sup> ;1107.5948[M-H-Mal] <sup>-</sup> ;945.5394[M-H-Glc] <sup>-</sup> ; |
| 16 | Malonyl-ginsenoside Rb1 | 63.711 | C <sub>57</sub> H <sub>94</sub> O <sub>26</sub> | 1193.5956 | 1193.5961 | 4.26  | 783.4839[M-H-2Glc] <sup>-</sup> ;621.4353[M-H-3Glc] <sup>-</sup> ;459.3817[M-H-4Glc] <sup>-</sup> ;323.0977[Glc-Glc-H] <sup>-</sup> ;179.0551[Glc-H] <sup>-</sup> 1077.6311[M-H] <sup>-</sup> ;945.5896[M-Arap-H] <sup>-</sup> ;783.5236[M-Arap-Glc-H] <sup>-</sup> ;                                                       |
| 17 | Ginsenoside Rb2         | 64.915 | C <sub>53</sub> H <sub>90</sub> O <sub>22</sub> | 1077.6311 | 1077.6314 | 1.26  | 621.4609[M-Arap-2Glc-H] <sup>-</sup> ;459.4037[M-Arap-3Glc-H] <sup>-</sup> 1077.6284[M-H] <sup>-</sup> ;945.5799[M-H-Xry] <sup>-</sup> ;783.5155[M-H-Xry-Glc] <sup>-</sup> ;                                                                                                                                                |
| 18 | Ginsenoside Rb3         | 64.982 | C <sub>53</sub> H <sub>90</sub> O <sub>22</sub> | 1077.6284 | 1077.6275 | 4.25  | 621.4529[M-H-Xry-Glc] <sup>-</sup> ;293.0940[XryGlc-H] <sup>-</sup> ;149.0465[Xry-H] <sup>-</sup> 991.5879[M-H+HCOOH] <sup>-</sup> ;945.5791[M-H] <sup>-</sup> ;783.5167[M-H-Glc] <sup>-</sup> ;                                                                                                                            |
| 19 | Ginsenoside Rd          | 72.541 | C <sub>48</sub> H <sub>82</sub> O <sub>18</sub> | 991.5879  | 991.5483  | 1.69  | 621.4575[M-H-2Glc] <sup>-</sup> ;459.3973[M-H-3Glc] <sup>-</sup> ;101.0238 2,5A1α/2,5A1β                                                                                                                                                                                                                                    |

| No | IDENTIFICATION         | RT     | FORMULE                                         | M/Z       | M/Z CAL   | PPM   | IONS                                                                                                                                                                                                                                                                                                                                                                                                                                                                           |
|----|------------------------|--------|-------------------------------------------------|-----------|-----------|-------|--------------------------------------------------------------------------------------------------------------------------------------------------------------------------------------------------------------------------------------------------------------------------------------------------------------------------------------------------------------------------------------------------------------------------------------------------------------------------------|
| 20 | Malonyl-Ginsenoside Rd | 74.08  | C <sub>51</sub> H <sub>84</sub> O <sub>21</sub> | 1031.5451 | 1031.5432 | 1.81  | 1031.5374[M-H] <sup>-</sup> ;945.5426[M-H-Mal] <sup>-</sup> ;783.4961[M-H-Glc-Mal] <sup>-</sup> ;765.4784[M-H-H <sub>2</sub> O-Glc-Mal] <sup>-</sup> ;621.4375[M-H-2Glc-Mal] <sup>-</sup> ;459.3864[M-H-3Glc-Mal] <sup>-</sup> 1165.5949[M-H+HCOOH] <sup>-</sup> ;1119.5988[M-H] <sup>-</sup> ;1077.5854[M-C <sub>2</sub> H <sub>2</sub> O-H] <sup>-</sup>                                                                                                                     |
| 21 | Ginsenoside Rs2/ Rs1   | 75.15  | C <sub>55</sub> H <sub>92</sub> O <sub>23</sub> | 1165.6514 | 1165.6011 | 3.58  | 945.5429[M-C <sub>2</sub> H <sub>2</sub> O-Araf-H] <sup>-</sup> ;915.5755[M-C <sub>2</sub> H <sub>2</sub> O-Glc-H] <sup>-</sup> ;783.5176[M-C <sub>2</sub> H <sub>2</sub> O-Glc-Araf-H] <sup>-</sup> ;621.4214[M-C <sub>2</sub> H <sub>2</sub> O-2Glc-Araf-H] <sup>-</sup> ;459.3903[M-C <sub>2</sub> H <sub>2</sub> O-3Glc-Araf-H] <sup>-</sup> 1165.6514[M-H+HCOOH] <sup>-</sup> ;1119.6416[M-H] <sup>-</sup> ;1077.6260[M-C <sub>2</sub> H <sub>2</sub> O-H] <sup>-</sup> ; |
| 22 | Ginsenoside Rs2/ Rs1   | 75.752 | C <sub>55</sub> H <sub>92</sub> O <sub>23</sub> | 1165.6022 | 1165.6011 | 4.67  | 945.5444[M-C <sub>2</sub> H <sub>2</sub> O-Arap-H] <sup>-</sup> ;915.5436[M-C <sub>2</sub> H <sub>2</sub> O-Glc-H] <sup>-</sup> ;783.4980[M-C <sub>2</sub> H <sub>2</sub> O-Glc-Arap-H] <sup>-</sup> ;621.4163[M-C <sub>2</sub> H <sub>2</sub> O-2Glc-Arap-H] <sup>-</sup> ;459.3801[M-C <sub>2</sub> H <sub>2</sub> O-3Glc-Arap-H] <sup>-</sup>                                                                                                                               |
| 23 | Ginsenoside Rg9/Rg10   | 81.304 | C <sub>42</sub> H <sub>70</sub> O <sub>13</sub> | 827.4785  | 827.4798  | -2.14 | 827.4767[M-H+HCOOH] <sup>-</sup> ;781.4718[M-H] <sup>-</sup> ;619.4133[M-H-Glc] <sup>-</sup> ;457.3612[M-H-2Glc] <sup>-</sup>                                                                                                                                                                                                                                                                                                                                                  |
| 24 | Ginsenoside Rg9/Rg10   | 79.966 | C <sub>42</sub> H <sub>70</sub> O <sub>13</sub> | 827.4785  | 827.4798  | -3.54 | 827.4767[M-H+HCOOH] <sup>-</sup> ;781.4759[M-H] <sup>-</sup> ;619.4167[M-H-Glc] <sup>-</sup> ;457.3706[M-H-2Glc] <sup>-</sup>                                                                                                                                                                                                                                                                                                                                                  |
| 25 | Notoginsenoside T5     | 82.976 | C <sub>41</sub> H <sub>68</sub> O <sub>12</sub> | 797.4671  | 797.4693  | 2.65  | 797.4642[M-H+HCOOH] <sup>-</sup> ;751.4656[M-H] <sup>-</sup> ;619.4252[M-H-Xylp] <sup>-</sup> ;457.3645[M-H-Xylp-Glc] <sup>-</sup>                                                                                                                                                                                                                                                                                                                                             |

| No | IDENTIFICATION        | RT     | FORMULE                                         | M/Z      | M/Z CAL  | PPM   | IONS                                                                                                                                                                                                                                                                                                                                   |
|----|-----------------------|--------|-------------------------------------------------|----------|----------|-------|----------------------------------------------------------------------------------------------------------------------------------------------------------------------------------------------------------------------------------------------------------------------------------------------------------------------------------------|
| 26 | Ginsenoside Rg6/Rg4   | 84.047 | C <sub>42</sub> H <sub>70</sub> O <sub>12</sub> | 811.4838 | 811.4849 | 2.88  | 811.4791[M-H+HCOOH] <sup>-</sup> ;765.4675[M-H] <sup>-</sup> ;619.4211[M-H-Rha] <sup>-</sup> ;457.3609[M-H-Glc-Rha] <sup>-</sup>                                                                                                                                                                                                       |
| 27 | Ginsenoside Rg6/Rg4   | 85.251 | C <sub>42</sub> H <sub>70</sub> O <sub>12</sub> | 811.4848 | 811.4849 | 3.11  | 811.4791[M-H+HCOOH] <sup>-</sup> ;765.4859[M-H] <sup>-</sup> ;619.4211[M-H-Rha] <sup>-</sup> ;457.3609[M-H-Glc-Rha] <sup>-</sup>                                                                                                                                                                                                       |
| 28 | Chikusetsusaponin IVa | 86.254 | C <sub>42</sub> H <sub>66</sub> O <sub>14</sub> | 793.4369 | 793.4380 | 4.22  | 793.4329[M-H] <sup>-</sup> ;613.3735[M-Glc-H] <sup>-</sup> ;587.3984[M-Glc-CO <sub>2</sub> -H] <sup>-</sup> ;455.3528[M-Glc-GlcA-H] <sup>-</sup>                                                                                                                                                                                       |
| 29 | Ginsenoside Rh4/Rk3   | 87.257 | C <sub>36</sub> H <sub>60</sub> O <sub>8</sub>  | 665.4273 | 665.4270 | -2.13 | 665.4235[M-H+HCOOH] <sup>-</sup> ;619.3950[M-H] <sup>-</sup> ;457.3587[M-H-Glc] <sup>-</sup>                                                                                                                                                                                                                                           |
| 30 | Ginsenoside Rh4/Rk4   | 87.194 | C <sub>36</sub> H <sub>60</sub> O <sub>8</sub>  | 665.4280 | 665.4270 | 3.65  | 665.4235[M-H+HCOOH] <sup>-</sup> ;619.3950[M-H] <sup>-</sup> ;457.3588[M-H-Glc] <sup>-</sup>                                                                                                                                                                                                                                           |
| 31 | 20(S)-ginsenoside Rg3 | 89.665 | C <sub>42</sub> H <sub>72</sub> O <sub>13</sub> | 829.4973 | 829.4955 | 4.25  | 829.4920[M-H+HCOOH] <sup>-</sup> ;783.4895[M-H] <sup>-</sup> ;621.4357[M-H-Glc] <sup>-</sup> ;549.3828[M-H-2Glc] <sup>-</sup>                                                                                                                                                                                                          |
| 32 | 20(R)-ginsenoside Rg3 | 90.535 | C <sub>42</sub> H <sub>72</sub> O <sub>13</sub> | 829.4973 | 829.4955 | -4.21 | 829.4920[M-H+HCOOH] <sup>-</sup> ;783.4897[M-H] <sup>-</sup> ;621.4385[M-H-Glc] <sup>-</sup> ;459.3853[M-H-2Glc] <sup>-</sup>                                                                                                                                                                                                          |
| 33 | 20(S)-ginsenoside Rs3 | 96.02  | C <sub>44</sub> H <sub>74</sub> O <sub>14</sub> | 871.5073 | 871.5061 | 3.32  | 871.5010[M-H+HCOOH] <sup>-</sup> ;825.5464[M-H] <sup>-</sup> ;783.4838[M-H-C <sub>2</sub> H <sub>2</sub> O] <sup>-</sup> ;765.4728[M-H-C <sub>2</sub> H <sub>2</sub> O-H <sub>2</sub> O] <sup>-</sup> ;621.4334[M-H-C <sub>2</sub> H <sub>2</sub> O-Glc] <sup>-</sup> ;459.3855[M-H-C <sub>2</sub> H <sub>2</sub> O-2Glc] <sup>-</sup> |
| 34 | 20(R)-ginsenoside Rs3 | 96.957 | C <sub>44</sub> H <sub>74</sub> O <sub>14</sub> | 871.5067 | 871.5061 | 2.58  | 871.5010[M-H+HCOOH] <sup>-</sup> ;825.5464[M-H] <sup>-</sup> ;783.4838[M-H-C <sub>2</sub> H <sub>2</sub> O] <sup>-</sup> ;765.4728[M-H-C <sub>2</sub> H <sub>2</sub> O-H <sub>2</sub> O] <sup>-</sup> ;621.4334[M-H-C <sub>2</sub> H <sub>2</sub> O-Glc] <sup>-</sup> ;459.3855[M-H-C <sub>2</sub> H <sub>2</sub> O-3Glc] <sup>-</sup> |

| No | IDENTIFICATION      | RT      | FORMULE                                         | M/Z      | M/Z CAL  | PPM   | IONS                                                                                                                          |
|----|---------------------|---------|-------------------------------------------------|----------|----------|-------|-------------------------------------------------------------------------------------------------------------------------------|
| 35 | Ginsenoside Rk1/Rg5 | 100.569 | C <sub>42</sub> H <sub>70</sub> O <sub>12</sub> | 811.4871 | 811.4849 | 2.99  | 811.4791[M-H+HCOOH] <sup>-</sup> ;765.4854[M-H] <sup>-</sup> ;603.4249[M-H-Glc] <sup>-</sup> ;441.3687[M-H-2Glc] <sup>-</sup> |
| 36 | Ginsenoside Rk1/Rg6 | 101.639 | C <sub>42</sub> H <sub>70</sub> O <sub>13</sub> | 811.4871 | 811.4849 | -3.32 | 811.4791[M-H+HCOOH] <sup>-</sup> ;765.4854[M-H] <sup>-</sup> ;603.4249[M-H-Glc] <sup>-</sup> ;441.3687[M-H-3Glc] <sup>-</sup> |

Table S3. Anti-Myocardial ischemia effect of 12 batches RGE (mean ±SD)

| Batch<br>(RGE) | Cell viability | LDH activity | ROS level   | ATP concentration |
|----------------|----------------|--------------|-------------|-------------------|
| 1              | 0.772±0.063    | 0.756±0.073  | 0.505±0.056 | 0.646±0.268       |
| 2              | 0.669±0.063    | 0.887±0.126  | 0.422±0.177 | 0.569±0.084       |
| 3              | 0.518±0.039    | 0.695±0.142  | 0.497±0.117 | 0.266±0.071       |
| 4              | 0.769±0.067    | 0.823±0.115  | 0.473±0.088 | 0.345±0.071       |
| 5              | 0.789±0.030    | 0.791±0.087  | 0.439±0.076 | 0.417±0.056       |
| 6              | 0.710±0.077    | 0.762±0.152  | 0.483±0.141 | 0.516±0.071       |
| 7              | 0.685±0.159    | 0.658±0.126  | 0.317±0.286 | 0.576±0.178       |
| 8              | 0.463±0.076    | 0.258±0.138  | 0.209±0.354 | 0.852±0.115       |
| 9              | 0.631±0.076    | 0.347±0.279  | 0.449±0.152 | 0.654±0.087       |
| 10             | 0.553±0.126    | 0.545±0.220  | 0.357±0.084 | 0.603±0.156       |
| 11             | 0.667±0.034    | 0.004±0.272  | 0.289±0.232 | 0.762±0.089       |
| 12             | 0.667±0.046    | 0.127±0.315  | 0.269±0.252 | 0.841±0.034       |

Table S4. LC–MS/MS data in the negative ion mode for identification of target cell extraction combined with cells

| No | IDENTIFICATION     | RT     | FORMULE                                         | M/Z       | M/Z CAL   | PPM   | IONS                                                                                                                                                                                                                                                                                                                                                          |
|----|--------------------|--------|-------------------------------------------------|-----------|-----------|-------|---------------------------------------------------------------------------------------------------------------------------------------------------------------------------------------------------------------------------------------------------------------------------------------------------------------------------------------------------------------|
| 1  | Ginsenoside Rg1    | 36.570 | C <sub>42</sub> H <sub>72</sub> O <sub>14</sub> | 845.4925  | 845.4904  | -2.47 | 845.4925[M-H+HCOOH] <sup>-</sup> ;<br>637.3475[M-H-Glc] <sup>-</sup> ; 475.3042[M-H-2Glc] <sup>-</sup>                                                                                                                                                                                                                                                        |
| 2  | Ginsenoside Rf     | 52.166 | C <sub>42</sub> H <sub>72</sub> O <sub>14</sub> | 845.4921  | 845.4904  | -2    | 845.4957[M-H+HCOOH] <sup>-</sup> ; 799.4869[M-H] <sup>-</sup> ;<br>637.4304[M-H-Glc] <sup>-</sup> ; 475.3801[M-H-2Glc] <sup>-</sup>                                                                                                                                                                                                                           |
| 3  | Notoginsenoside R2 | 55.030 | C <sub>41</sub> H <sub>70</sub> O <sub>13</sub> | 815.4825  | 815.4978  | -3.25 | 815.4825[M-H+HCOOH] <sup>-</sup> ; 769.4743[M-H] <sup>-</sup> ;<br>637.3430[M-H-Xylp] <sup>-</sup> ;<br>475.4979[M-H-Glc-Xylp] <sup>-</sup>                                                                                                                                                                                                                   |
| 4  | Ginsenoside Rb1    | 55.023 | C <sub>54</sub> H <sub>92</sub> O <sub>23</sub> | 1153.6046 | 1153.6011 | -2.99 | 1153.6046[M-H+HCOOH] <sup>-</sup> ;<br>1107.5987[M-H] <sup>-</sup> ;<br>945.5479[M-H-Glc] <sup>-</sup> ; 783.4832[M-H-2Glc] <sup>-</sup> ;<br>621.4303[M-H-3Glc] <sup>-</sup> ; 459.9744[M-H-4Glc] <sup>-</sup>                                                                                                                                               |
| 5  | Ginsenoside Rg2    | 58.635 | C <sub>42</sub> H <sub>72</sub> O <sub>13</sub> | 829.4994  | 829.4955  | -4.7  | 829.4994[M-H+HCOOH] <sup>-</sup> ; 783.4933[M-H] <sup>-</sup> ;<br>475.8112[M-H-Rha-Glc] <sup>-</sup> ;<br>391.9717[M-H-Rha-Glc-C <sub>6</sub> H <sub>12</sub> ] <sup>-</sup>                                                                                                                                                                                 |
| 6  | Ginsenoside Rb3    | 58.702 | C <sub>53</sub> H <sub>90</sub> O <sub>22</sub> | 1123.5971 | 1123.5906 | -5.8  | 1077.5891[M-H] <sup>-</sup> ; 945.6899[M-Arap-H] <sup>-</sup> ;<br>783.4933[M-Arap-Glc-H] <sup>-</sup> ;<br>621.4260[M-Arap-2Glc-H] <sup>-</sup> ;<br>459.3817 [M-Arap-3Glc-H] <sup>-</sup>                                                                                                                                                                   |
| 7  | Ginsenoside Ro     | 61.664 | C <sub>48</sub> H <sub>76</sub> O <sub>19</sub> | 955.4967  | 955.4908  | -6.16 | 955.5309[M-H] <sup>-</sup> ; 793.4684 [M-H-Glc] <sup>-</sup> ; 775.4506[M-H-H <sub>2</sub> O-Glc] <sup>-</sup> ;<br>731.4477[M-H-CO <sub>2</sub> -H <sub>2</sub> O-Glc] <sup>-</sup> ;<br>613.4180[M-H-H <sub>2</sub> O-2Glc] <sup>-</sup> ;<br>569.3882[M-H-CO <sub>2</sub> -H <sub>2</sub> O-2Glc] <sup>-</sup> ;<br>455.3461 [M-H-2Glc -GlcA] <sup>-</sup> |



| No | IDENTIFICATION        | RT     | FORMULE                                         | M/Z       | M/Z CAL   | PPM   | IONS                                                                                                                                                                                                                                                                                                                                                                                     |
|----|-----------------------|--------|-------------------------------------------------|-----------|-----------|-------|------------------------------------------------------------------------------------------------------------------------------------------------------------------------------------------------------------------------------------------------------------------------------------------------------------------------------------------------------------------------------------------|
| 8  | Ginsenoside Rb2       | 62.653 | C <sub>53</sub> H <sub>90</sub> O <sub>22</sub> | 1123.5948 | 1123.5906 | -3.75 | 1077.5916[M-H] <sup>-</sup> ;<br>945.5488[M-Arap-H] <sup>-</sup> ;<br>783.4918[M-Arap-Glc-H] <sup>-</sup> ;<br>621.4609[M-Arap-2Glc-H] <sup>-</sup> ;459.4037[M-Arap-3Glc-H] <sup>-</sup><br>991.5490[M-H+HCOOH] <sup>-</sup> ;945.5458[M-H] <sup>-</sup> ;                                                                                                                              |
| 9  | Ginsenoside Rd        | 72.010 | C <sub>48</sub> H <sub>82</sub> O <sub>18</sub> | 991.5515  | 991.5483  | -3.21 | 783.5001[M-H-Glc] <sup>-</sup> ;<br>621.4389[M-H-2Glc] <sup>-</sup> ;<br>459.1710[M-H-3Glc] <sup>-</sup><br>811.4857[M-H+HCOOH] <sup>-</sup> ;765.4814[M-H] <sup>-</sup> ;619.4175[M-H-Rha] <sup>-</sup> ;<br>457.3781[M-H-Glc-Rha] <sup>-</sup><br>811.4758[M-H+HCOOH] <sup>-</sup> ;765.4839[M-H] <sup>-</sup> ;619.4089[M-H-Rha] <sup>-</sup> ;<br>457.3638[M-H-Glc-Rha] <sup>-</sup> |
| 10 | Ginsenoside Rg6/Rg4   | 83.714 | C <sub>42</sub> H <sub>70</sub> O <sub>12</sub> | 811.4857  | 811.4849  | -0.95 | 665.4299[M-H+HCOOH] <sup>-</sup> ;619.4241[M-H] <sup>-</sup> ;457.3665[M-H-Glc] <sup>-</sup><br>665.4283[M-H+HCOOH] <sup>-</sup> ;619.4232[M-H] <sup>-</sup> ;457.4178[M-H-Glc] <sup>-</sup>                                                                                                                                                                                             |
| 11 | Ginsenoside Rg6/Rg4   | 84.974 | C <sub>42</sub> H <sub>70</sub> O <sub>12</sub> | 811.4897  | 811.4849  | -5.87 | 829.4993[M-H+HCOOH] <sup>-</sup> ;783.4921[M-H] <sup>-</sup> ;621.4371[M-H-Glc] <sup>-</sup> ;<br>459.3733[M-H-2Glc] <sup>-</sup>                                                                                                                                                                                                                                                        |
| 12 | Ginsenoside Rh4/Rk3   | 86.046 | C <sub>36</sub> H <sub>60</sub> O <sub>8</sub>  | 665.4294  | 665.4270  | -3.57 | 829.4982 [M-H+HCOOH] <sup>-</sup> ;783.4825[M-H] <sup>-</sup> ;621.4304[M-H-Glc] <sup>-</sup> ;<br>459.2037[M-H-2Glc] <sup>-</sup>                                                                                                                                                                                                                                                       |
| 13 | Ginsenoside Rh4/Rk4   | 87.587 | C <sub>36</sub> H <sub>60</sub> O <sub>8</sub>  | 665.4313  | 665.4270  | -6.42 |                                                                                                                                                                                                                                                                                                                                                                                          |
| 14 | 20(S)-ginsenoside Rg3 | 89.370 | C <sub>42</sub> H <sub>72</sub> O <sub>13</sub> | 829.4985  | 829.4955  | -3.62 |                                                                                                                                                                                                                                                                                                                                                                                          |
| 15 | 20(R)-ginsenoside Rg3 | 90.217 | C <sub>42</sub> H <sub>72</sub> O <sub>13</sub> | 829.4995  | 829.4955  | -4.46 |                                                                                                                                                                                                                                                                                                                                                                                          |

| No | IDENTIFICATION      | RT      | FORMULE                                         | M/Z      | M/Z CAL  | PPM   | IONS                                                                                                                                  |
|----|---------------------|---------|-------------------------------------------------|----------|----------|-------|---------------------------------------------------------------------------------------------------------------------------------------|
| 16 | Ginsenoside Rk1/Rg5 | 100.267 | C <sub>42</sub> H <sub>70</sub> O <sub>12</sub> | 811.4877 | 811.4849 | -3.41 | 811.4861[M-H+HCOOH] <sup>-</sup> ;<br>765.4803[M-H] <sup>-</sup> ;603.4233[M-H-Glc] <sup>-</sup> ;<br>441.9177[M-H-2Glc] <sup>-</sup> |
| 17 | Ginsenoside Rk1/Rg5 | 101.471 | C <sub>42</sub> H <sub>70</sub> O <sub>13</sub> | 811.4856 | 811.4849 | -0.82 | 811.4844[M-H+HCOOH] <sup>-</sup> ;765.4806[M-H] <sup>-</sup> ;<br>603.4179[M-H-Glc] <sup>-</sup> ; 441.3294[M-H-3Glc] <sup>-</sup>    |

Table S5. The result of GRA model and PLS model.

|        | GRA (Correlation coefficient) |          |          |          | PLS (VIP value) |          |          |          |
|--------|-------------------------------|----------|----------|----------|-----------------|----------|----------|----------|
|        | MTT-GRA                       | LDH-GRA  | ATP-GRA  | ROS-GRA  | MTT-PLS         | LDH-PLS  | ATP-PLS  | ROS-PLS  |
| PEAK1  | 1.095564                      | 1.042833 | 1.091511 | 1.129462 | 1.138134        | 0.969394 | 0.811433 | 0.924449 |
| PEAK2  | 1.021934                      | 1.034972 | 0.997137 | 1.07672  | 1.288984        | 0.955944 | 1.407459 | 0.833158 |
| PEAK3  | 1.027012                      | 0.99698  | 1.030665 | 1.074147 | 1.477286        | 0.935253 | 0.933775 | 0.909759 |
| PEAK4  | 1.052401                      | 1.066414 | 1.009555 | 1.102448 | 0.904057        | 0.757307 | 0.784245 | 0.763903 |
| PEAK5  | 1.0067                        | 1.029732 | 0.994654 | 0.980239 | 0.570108        | 1.072851 | 0.765423 | 0.760756 |
| PEAK6  | 1.002892                      | 1.048073 | 0.984719 | 1.022691 | 1.070512        | 0.674541 | 0.532241 | 1.526758 |
| PEAK7  | 0.968616                      | 0.961607 | 0.961126 | 0.995676 | 1.249451        | 0.824554 | 0.763332 | 0.732424 |
| PEAK8  | 1.018125                      | 1.023181 | 0.974785 | 1.067715 | 1.138134        | 0.811104 | 0.766469 | 0.826863 |
| PEAK9  | 1.05621                       | 1.069035 | 0.984719 | 1.047132 | 1.316033        | 0.782136 | 1.015336 | 1.263379 |
| PEAK10 | 0.964807                      | 0.970778 | 0.922631 | 1.003395 | 1.249451        | 0.93008  | 1.081213 | 0.700944 |
| PEAK11 | 0.943226                      | 0.981258 | 0.935049 | 0.927497 | 0.533696        | 0.732477 | 0.779017 | 0.790136 |
| PEAK12 | 0.985119                      | 1.00484  | 0.972302 | 0.953225 | 0.585713        | 1.109061 | 0.69641  | 0.798531 |
| PEAK13 | 1.082869                      | 1.045453 | 1.117588 | 1.050992 | 1.412785        | 1.083197 | 1.309167 | 1.532004 |
| PEAK14 | 0.920375                      | 0.974708 | 0.891587 | 0.937788 | 0.72928         | 0.731442 | 0.730917 | 0.730325 |
| PEAK15 | 1.066366                      | 1.053313 | 1.125039 | 1.034268 | 1.121489        | 1.119407 | 1.308121 | 1.352571 |
| PEAK16 | 0.848015                      | 0.903963 | 0.853092 | 0.837449 | 0.655416        | 0.67661  | 0.707912 | 0.762854 |
| PEAK17 | 0.88483                       | 0.86335  | 0.889104 | 0.886332 | 0.642931        | 1.204242 | 1.169048 | 0.752361 |

|        |          |          |          |          |          |          |          |          |
|--------|----------|----------|----------|----------|----------|----------|----------|----------|
| PEAK18 | 0.88356  | 0.920994 | 0.892829 | 0.859317 | 0.543059 | 0.662126 | 0.776926 | 0.796432 |
| PEAK19 | 1.03209  | 1.084756 | 1.030665 | 1.034268 | 1.12565  | 1.607725 | 1.562217 | 1.326338 |
| PEAK20 | 1.033359 | 0.940646 | 1.113863 | 0.991817 | 1.284823 | 1.94603  | 1.991983 | 2.181532 |
| PEAK21 | 0.978771 | 0.981258 | 0.976027 | 0.958371 | 0.506647 | 0.894905 | 0.611711 | 0.83001  |
| PEAK22 | 0.85944  | 0.906583 | 0.867994 | 0.841308 | 0.715755 | 0.939391 | 0.708958 | 0.84575  |
| PEAK23 | 0.869596 | 0.941956 | 0.892829 | 0.873468 | 0.81979  | 0.974567 | 0.816661 | 0.802728 |
| PEAK24 | 1.068905 | 0.991739 | 1.089028 | 1.07672  | 1.309791 | 1.415294 | 1.423144 | 1.162644 |
| PEAK25 | 0.821356 | 0.889552 | 0.818323 | 0.851599 | 1.502254 | 0.920769 | 1.117811 | 0.92235  |
| PEAK26 | 1.034629 | 1.054624 | 1.014522 | 1.014972 | 0.683505 | 0.800759 | 0.985012 | 0.976915 |
| PEAK27 | 1.040976 | 1.012701 | 1.015764 | 1.07286  | 1.049705 | 0.934218 | 0.817707 | 0.757608 |
| PEAK28 | 0.892447 | 0.941956 | 0.927598 | 0.867036 | 1.076754 | 0.944564 | 0.929592 | 0.972718 |
| PEAK29 | 1.028281 | 0.987809 | 1.061709 | 1.012399 | 0.874928 | 1.174239 | 0.8794   | 0.826863 |
| PEAK30 | 1.046054 | 1.019251 | 1.017005 | 1.080579 | 1.036181 | 0.880421 | 0.792611 | 0.762854 |
| PEAK31 | 1.063827 | 1.033662 | 1.059225 | 1.02655  | 0.845798 | 1.007673 | 1.130359 | 1.142707 |
| PEAK32 | 1.067635 | 1.037592 | 1.080335 | 1.035555 | 0.891573 | 1.122511 | 1.230742 | 1.218258 |
| PEAK33 | 1.075252 | 1.045453 | 1.09772  | 1.056137 | 1.047625 | 1.168032 | 1.247473 | 1.177335 |
| PEAK34 | 1.085408 | 1.052003 | 1.098962 | 1.106307 | 1.324356 | 0.787309 | 0.926455 | 0.700944 |
| PEAK35 | 1.099372 | 1.048073 | 1.127522 | 1.075433 | 1.364929 | 1.337702 | 1.262112 | 1.429171 |
| PEAK36 | 1.073983 | 1.038902 | 1.082819 | 1.038128 | 0.91342  | 1.112165 | 1.227605 | 1.205666 |
